# Supplementary material
Source: PubMed Central journal article supplement (PMC4619122)
Supplement: NIHMS717762-supplement-306539R2_Acknowledgment_Permissions.pdf [file NIHMS717762-supplement-306539R2_Acknowledgment_Permissions.pdf]

## Circulation Research

---

**From:** Swartwood, Steven J <Steven.Swartwood@cshs.org>  
**Sent:** Tuesday, August 18, 2015 3:30 PM  
**To:** circulation.research@circresearch.com  
**Cc:** Shen, Xiao (Gregory)  
**Subject:** CIRCRES/2015/306539R1 Permission to be acknowledged

Hello,

I give my permission to be in the acknowledgments of manuscript number: CIRCRES/2015/306539R1

Submitted by Dr. Bernstein and Xiao (Gregory) Shen.

Steven Swartwood HT (ASCP)  
Cedars-Sinai Medical Center  
Translational & Research Molecular Pathology

**IMPORTANT WARNING:** This message is intended for the use of the person or entity to which it is addressed and may contain information that is privileged and confidential, the disclosure of which is governed by applicable law. If the reader of this message is not the intended recipient, or the employee or agent responsible for delivering it to the intended recipient, you are hereby notified that any dissemination, distribution or copying of this information is strictly prohibited. Thank you for your cooperation.

## Circulation Research

---

**From:** Shen, Xiao (Gregory) <Xiao.Shen@cshs.org>  
**Sent:** Tuesday, August 18, 2015 4:25 PM  
**To:** circulation.research@circresearch.com  
**Subject:** FW: CIRCRES/2015/306539R1

Dear Editor,

Here, I forward Dr. Beatrice Knudsen's permission to be acknowledged for this paper.

Xiao Shen

-----Original Message-----

From: Knudsen, Beatrice, M.D., Ph.D.  
Sent: Tuesday, August 18, 2015 1:07 PM  
To: Shen, Xiao (Gregory)  
Cc: Wawrowsky, Kolja A.; Swartwood, Steven J; Bernstein, Kenneth, M.D.  
Subject: CIRCRES/2015/306539R1

I accept to have my name listed in the acknowledgement of this paper.

Thank you. Beatrice Knudsen

Sent from my iPhone

> On Aug 17, 2015, at 2:19 PM, Shen, Xiao (Gregory) <Xiao.Shen@cshs.org> wrote:

>

> CIRCRES/2015/306539R1

IMPORTANT WARNING: This message is intended for the use of the person or entity to which it is addressed and may contain information that is privileged and confidential, the disclosure of which is governed by applicable law. If the reader of this message is not the intended recipient, or the employee or agent responsible for delivering it to the intended recipient, you are hereby notified that any dissemination, distribution or copying of this information is strictly prohibited. Thank you for your cooperation.

## Circulation Research

---

**From:** Birgitte Sander Nielsen <birgittesander@hotmail.com>  
**Sent:** Wednesday, August 19, 2015 8:36 AM  
**To:** circulation.research@circresearch.com

I hereby permit, that I am acknowledged in the article **“Altered metabolism of LDL in the arterial wall precedes atherosclerosis regression” (CIRCRES/2015/307182D/R1).**

Best regards

Birgitte Sander Nielsen

Sendt fra Windows Mail
